# Supplementary material for: Engineering polymorphs in colloidal metal dichalcogenides: precursor-mediated phase control, molecular insights into crystallisation kinetics and promising electrochemical activity
Source: Royal Society of Chemistry journal article supplement (doi:10.1039/d2ta09892j), 2023-01-01
Supplement: d2ta09892j1.pdf [file d2ta09892j1.pdf]

## Supporting Information

# Engineering polymorphs in colloidal metal dichalcogenides: Precursor mediated phase control, molecular insights into crystallisation kinetics and promising electrochemical activity disulphides

Nilotpal Kapuria<sup>1a</sup>, Niraj Nitish Patil<sup>1a</sup>, Abinaya Sankaran<sup>a</sup>, Fathima Laffir<sup>a</sup>, Hugh Geaney<sup>a</sup>, Edmond Magner<sup>a</sup>, Kevin M Ryan<sup>a</sup> and Shalini Singh<sup>\*a</sup>

Email: Shalini.Singh@ul.ie

Department of Chemical Sciences and Bernal Institute, University of Limerick, V94T9PX, Limerick, Ireland

### **Table of content:**

|                                                                              |      |
|------------------------------------------------------------------------------|------|
| 1.1.TEM analysis of the MoS <sub>2</sub> nanosheets in conditions R2 and R4. | 2    |
| 1.2. HRTEM of 1T phase of the MS <sub>2</sub> nanosheets.                    | 3    |
| 1.3.UV-Vis-NIR absorption spectra of TMDs                                    | 4    |
| 1.4. Reactivity comparison of Mo and S-precursors                            | 5    |
| 1.5.Reactivity comparison of W-precursors.                                   | 5    |
| 1.6.XPS analysis of the nanosheets synthesised using thiourea.               | 6    |
| 1.7. <sup>1</sup> H NMR of S-oleylamine                                      | 7    |
| 1.8.Electrochemical performance                                              | 8-15 |

### 1.1 TEM analysis of the MoS<sub>2</sub> nanosheets in conditions R2 and R4.

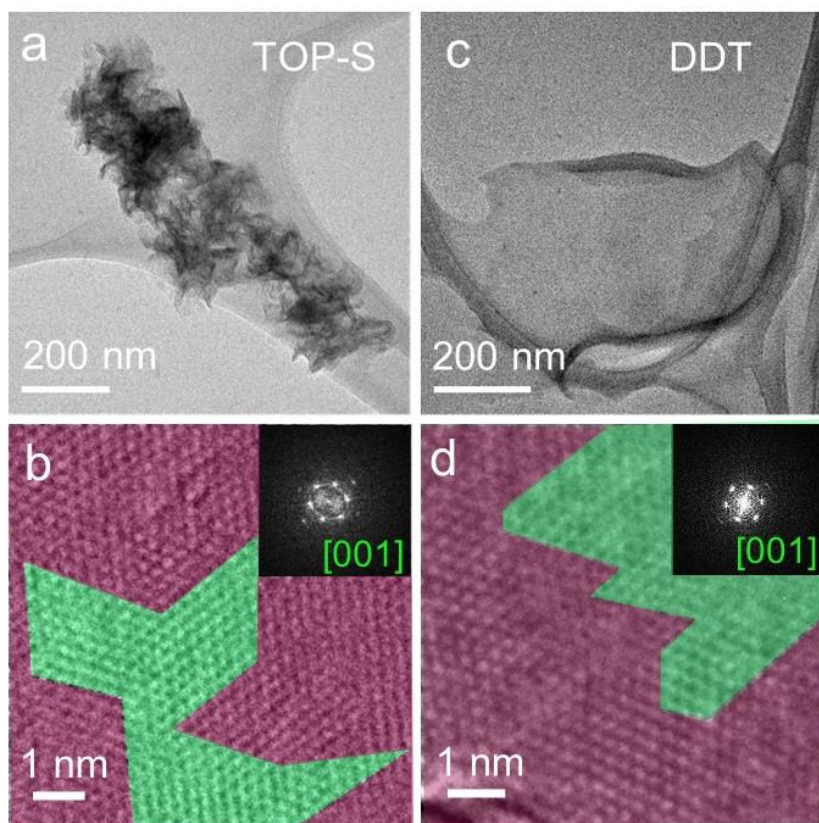

Figure S1 (a) Low magnification TEM image and (b)HRTEM of MoS<sub>2</sub> nanosheets prepared under condition R2; (c) Low magnification TEM image and (d)HRTEM of MoS<sub>2</sub> nanosheets prepared under condition R4. The green region shows 2H dominated area and magenta region exhibits 1T dominated areas of the nanosheets.

## 1.2.HRTEM of 1T phase of the MS<sub>2</sub> nanosheets.

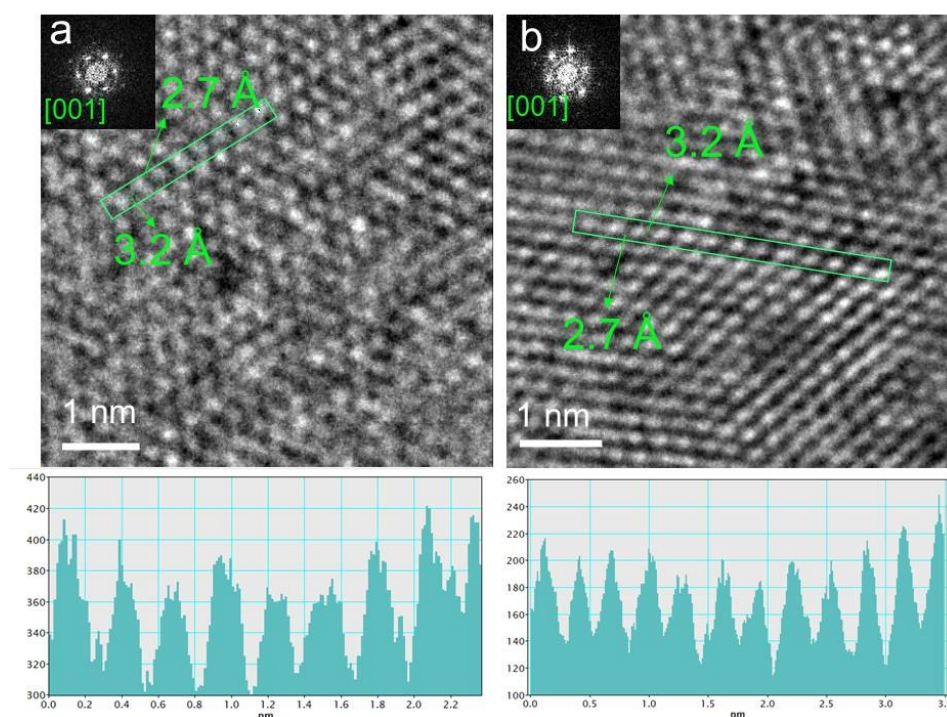

Figure S2. HRTEM of 1T phase of (a)MoS<sub>2</sub> and (b) WS<sub>2</sub> prepared in condition R6 and R6' with intensity profile displaying uneven M-M distance due to distorted atomic arrangement in the 1T phase.

### 1.3. UV-Vis-NIR absorption spectra of TMDs.

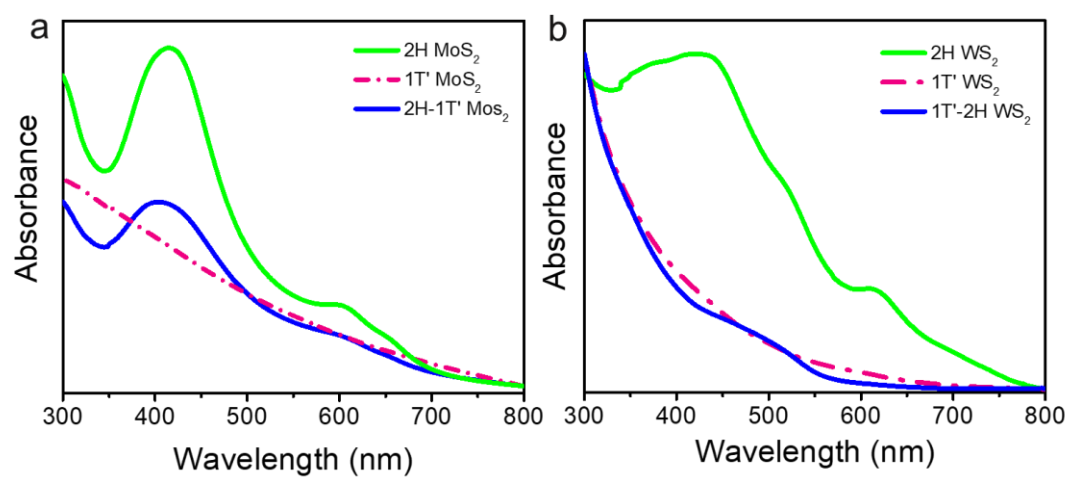

Figure S3. UV-Vis-NIR absorption spectra of the MoS<sub>2</sub> and WS<sub>2</sub> NCs synthesized.

#### 1.4. Comparison of Mo and S-precursors.

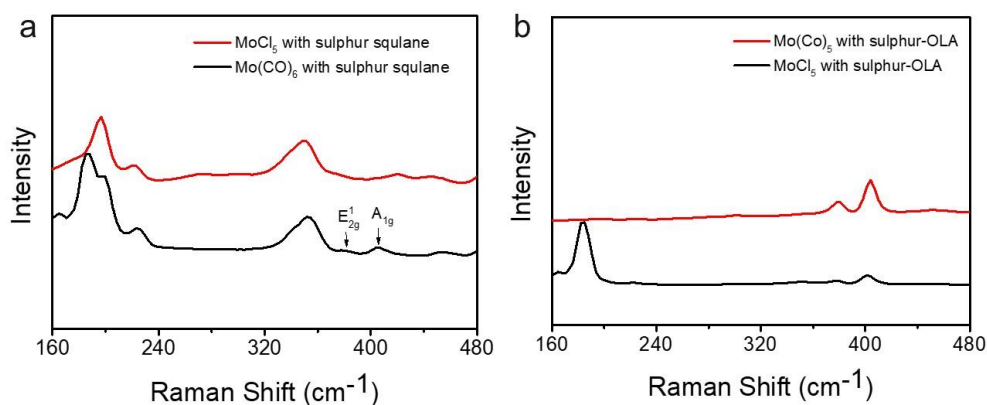

Figure S4. Mo-precursor reactivity comparison; Raman spectra of MoS<sub>2</sub> prepared with MoCl<sub>5</sub> and Mo(CO)<sub>6</sub> as metal source with (a) S-squalane and; (b) S-OLA. S-squalane suspension is reactive towards 1T phase formation, however lower reactivity of Mo(CO)<sub>5</sub> renders with some 2H phase formation. On the other hand, once OLA reduces S-precursor reactivity, 2H formation is increased. Even when highly reactive MoCl<sub>5</sub> is used, some 2H phase formation is noticed.

#### 1.5. Reactivity comparison of W-precursors.

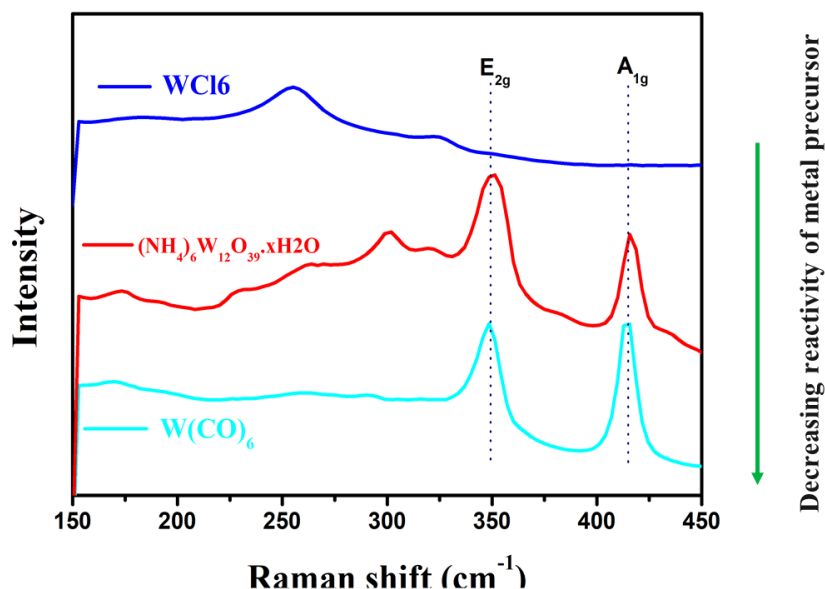

Figure S5. W-precursor reactivity comparison; Raman spectra of WS<sub>2</sub> prepared with WCl<sub>6</sub>, (NH<sub>4</sub>)<sub>6</sub>W<sub>12</sub>O<sub>39</sub>.xH<sub>2</sub>O and W(CO)<sub>6</sub> as metal source with S-OLA. The reactivity trend of the W precursor is WCl<sub>6</sub> > (NH<sub>4</sub>)<sub>6</sub>W<sub>12</sub>O<sub>39</sub>.xH<sub>2</sub>O > W(CO)<sub>6</sub> towards 1T phase formation.

## 1.6.XPS analysis of the nanosheets synthesised using thiourea.

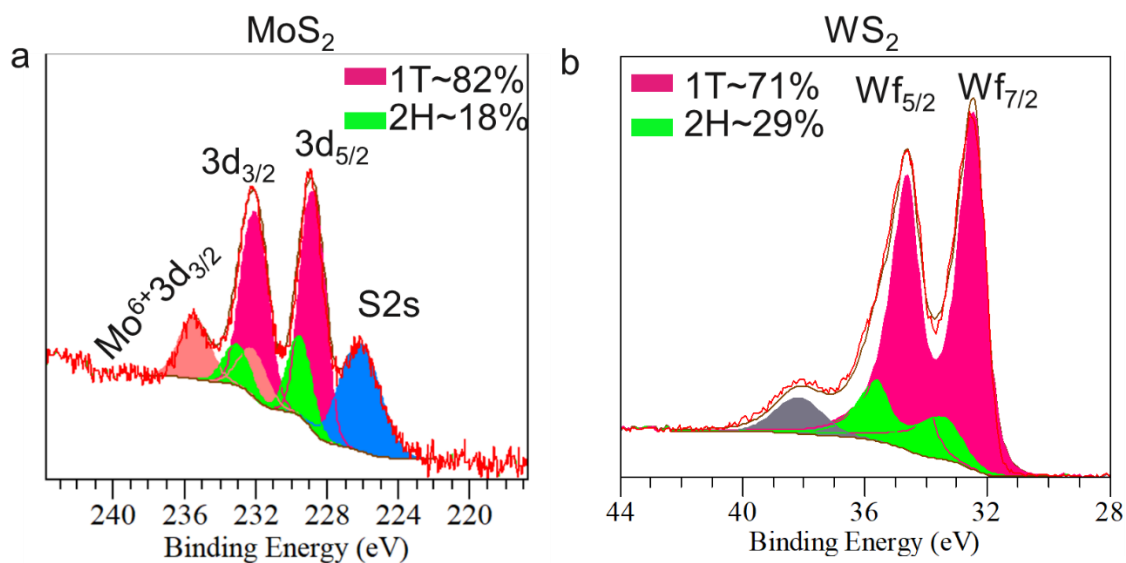

Figure S6. XPS analysis of as prepared (a) MoS<sub>2</sub> NCs, (b)WS<sub>2</sub> NCs synthesized using condition R6 and R6' respectively. Using thiourea leads to higher 1T phase formation due to the higher reactivity of thiourea. In the XPS spectra, the peaks at ~228 (3d<sub>5/2</sub>) and ~232 eV (3d<sub>3/2</sub>) correspond to 1T' phase, whereas the characteristic peaks of 2H MoS<sub>2</sub> phase appear at ~229 (Mo 3d<sub>5/2</sub>) and ~233 eV (Mo 3d<sub>3/2</sub>) while some MoO<sub>3</sub> formation is also visible as confirmed from the Mo<sup>6+</sup> 3d<sub>3/2</sub> peak at ~236 eV and 3d<sub>5/2</sub> peak at ~232.5 eV. For 1T' WS<sub>2</sub>, the characteristic W4f peaks correspond to 31.5 (W4f<sub>7/2</sub>) and 33.7 eV (W4f<sub>5/2</sub>) where the grey peak corresponds to W<sub>5</sub>P<sub>3/2</sub> of WO<sub>3-x</sub>.

### 1.7. $^1\text{H}$ NMR of S-oleylamine.

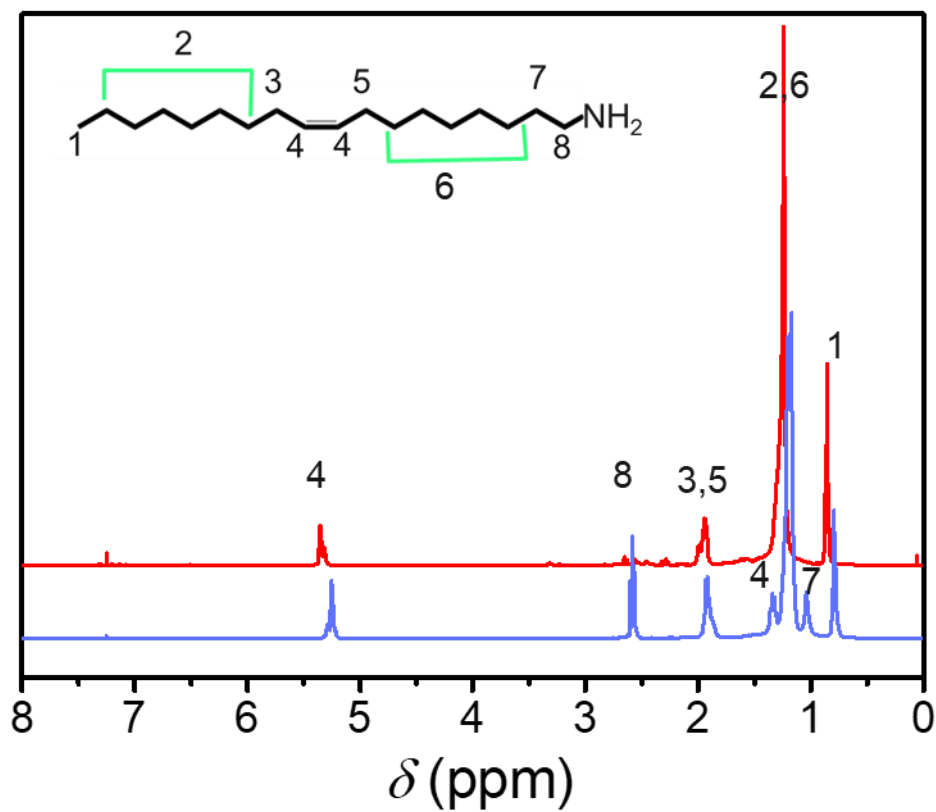

Figure S7.  $^1\text{H}$  NMR of S-oleylamine solution (red spectra) heated at reaction condition.  $\text{CDCl}_3$  used as reference displays peak  $\sim 7.26$  ppm. The  $\alpha$ -proton peak at  $\sim 2.7$  ppm of the oleylamine (blue spectra) diminished after reacting with S.

## 1.8. Electrochemical performance.

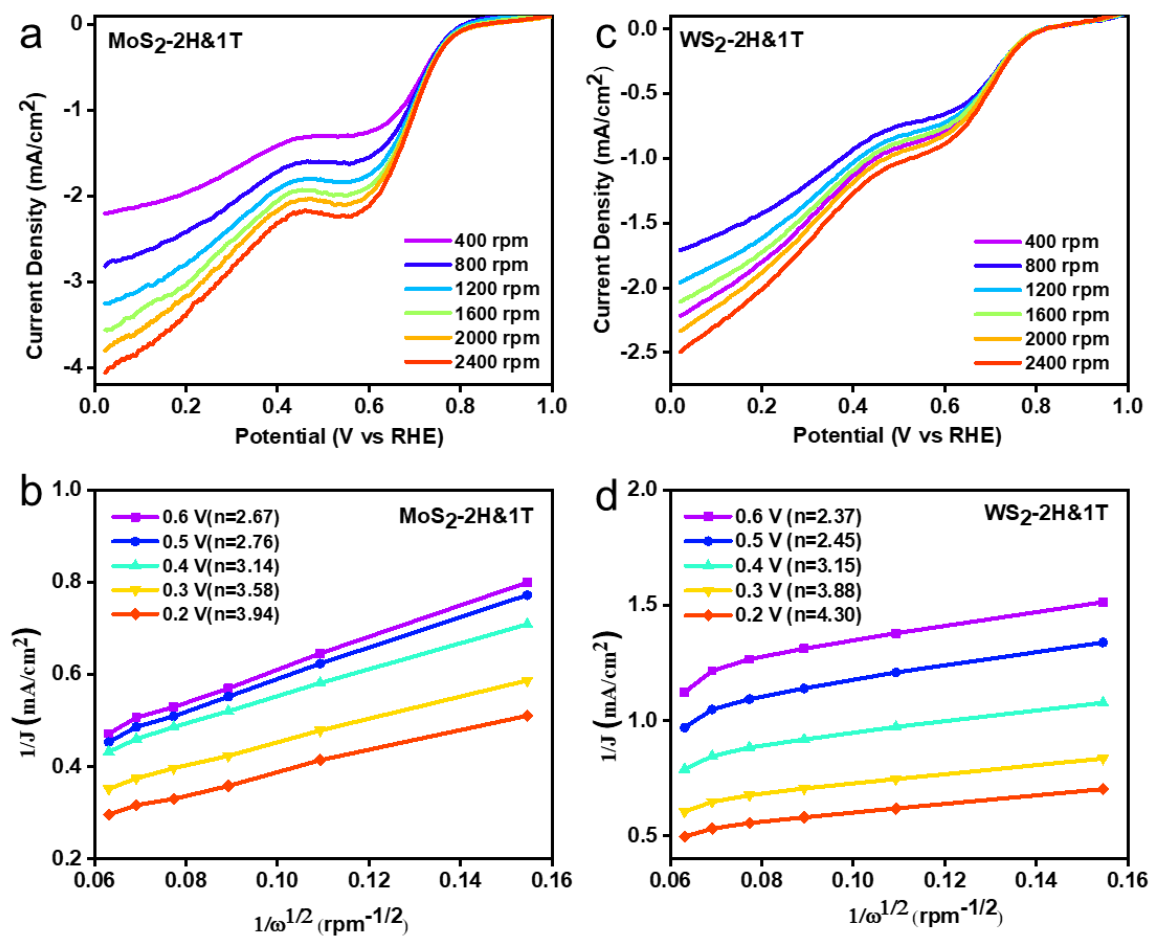

Figure S8. Rotating disc voltammograms of (a) Polytypic 2H-1T' MoS<sub>2</sub> at different rate of rotations in 0.1 M KOH, (b) Koutecky-Levich (K-L) plots of the current response of (b) 2H-1T' MoS<sub>2</sub> nanosheets; (c) Rotating disc voltammograms of 2H-1T' WS<sub>2</sub> nanosheets, (d) Koutecky-Levich (K-L) plots of the current response of 2H-1T' WS<sub>2</sub> nanosheets.

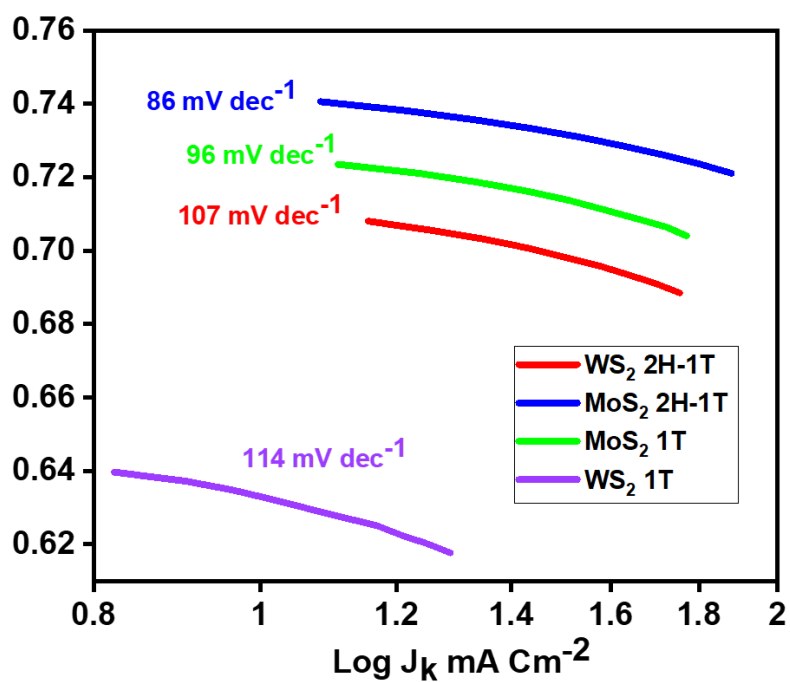

Figure S9. Tafel slope of the  $\text{MoS}_2$  and  $\text{WS}_2$  NCs. The  $\text{MoS}_2$  polytypic material exhibits a low Tafel slope value of  $86 \text{ mV/dec}$ . compared to 1T'  $\text{MoS}_2$  with  $96 \text{ mV/dec}$ . A similar trend was followed in  $\text{WS}_2$ , where the polytypic  $\text{WS}_2$  phase displays a Tafel slope of  $107 \text{ mV/dec}$  compared to the 1T' phase with  $114 \text{ mV/dec}$ . The polytypic electrocatalysts exhibit lower overpotential compared to 1T' counterparts attributed to improved ORR kinetics and lower corrosion rate.

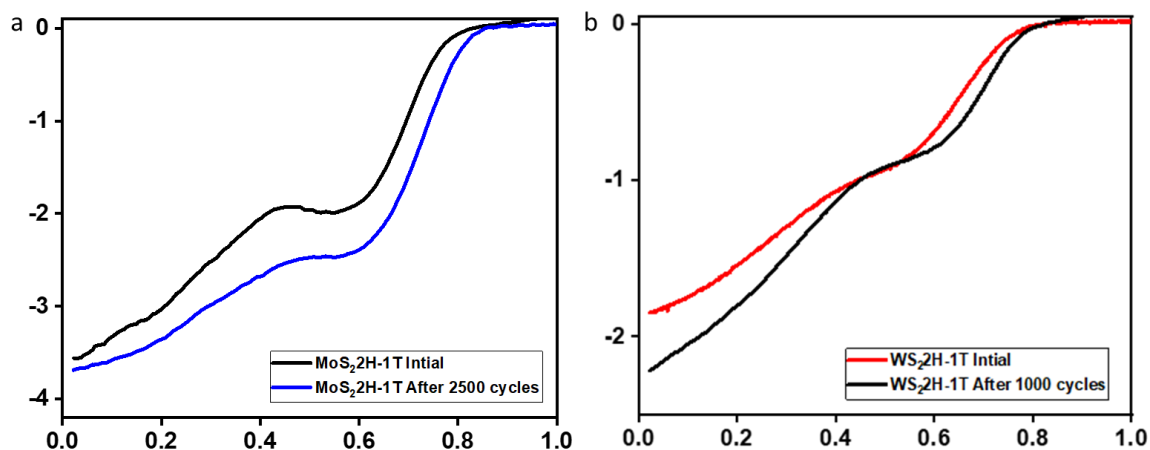

Figure S10. ORR stability test of the polytypic TMDs. The LSV was recorded at 1600 rpm after 2500 CV cycles for the MoS<sub>2</sub> sample and 1000 cycles for the WS<sub>2</sub> catalyst. We notice from the LSV that the MoS<sub>2</sub> electrocatalyst shows a positive shift in the onset potential from 0.82 to 0.84 V and a 32 mV positive shift in the half-wave potential with increased current density -3.68 mA.cm<sup>-2</sup> after 2500 CV cycles. This can occur due to ligand stripping, which is insulating in nature. In the case of WS<sub>2</sub>, we observe a negative shift in the onset potential from 0.79 v to 0.78V and a 20 mV negative shift in half-wave potential with a lower current density of -1.8. mA.cm<sup>-2</sup>. This is due to the catalyst's structural degradation, as seen in the TEM image shown in Figure S12.

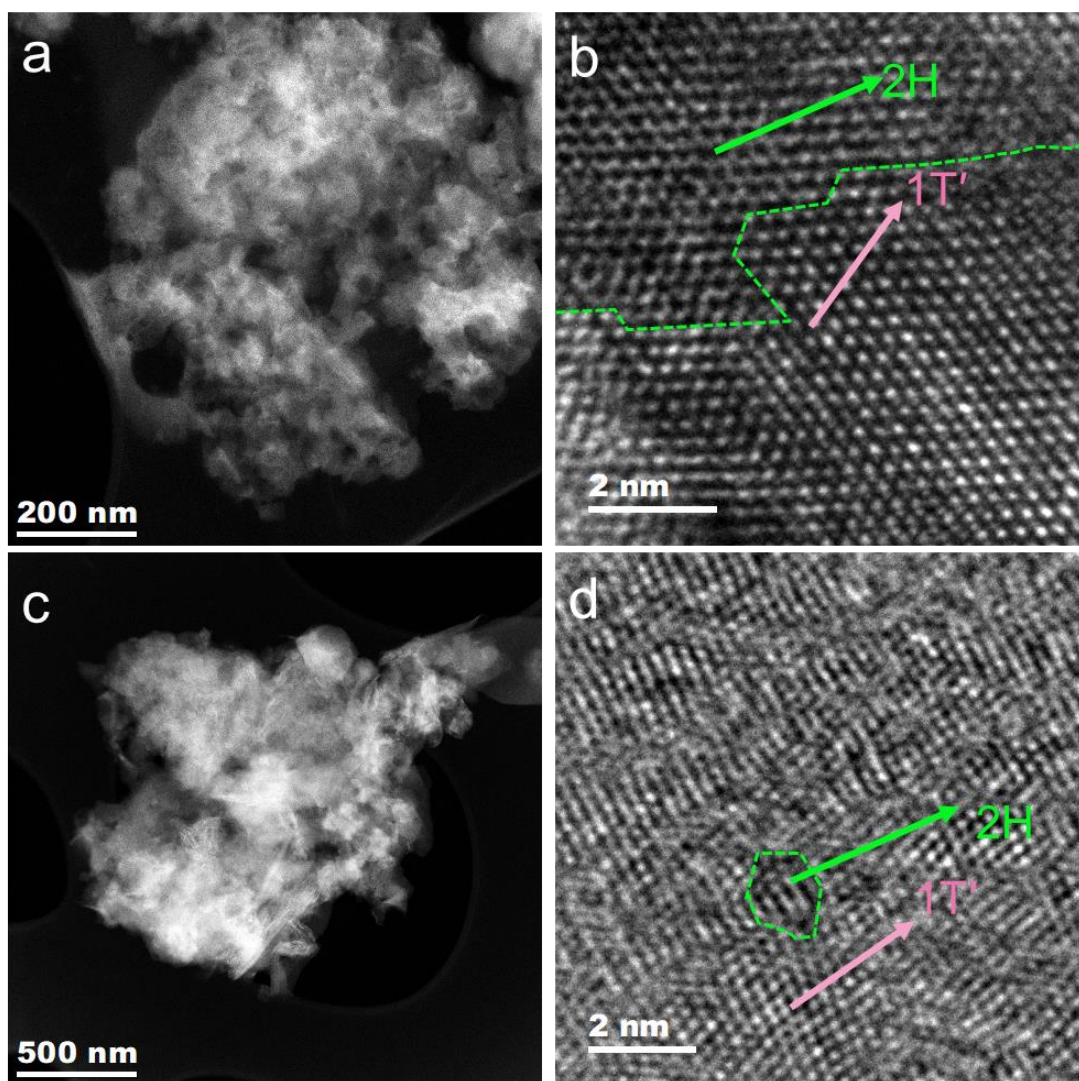

Figure S11. (a) STEM and (b) HRTEM image of polytypic  $\text{MoS}_2$  nanosheets and (c) STEM and (d) HRTEM image of  $\text{WS}_2$  after 1500 cycles of ORR. After 2500 cycles for  $\text{MoS}_2$  and 1000 cycles for  $\text{WS}_2$ , the polytypic nature is still present.

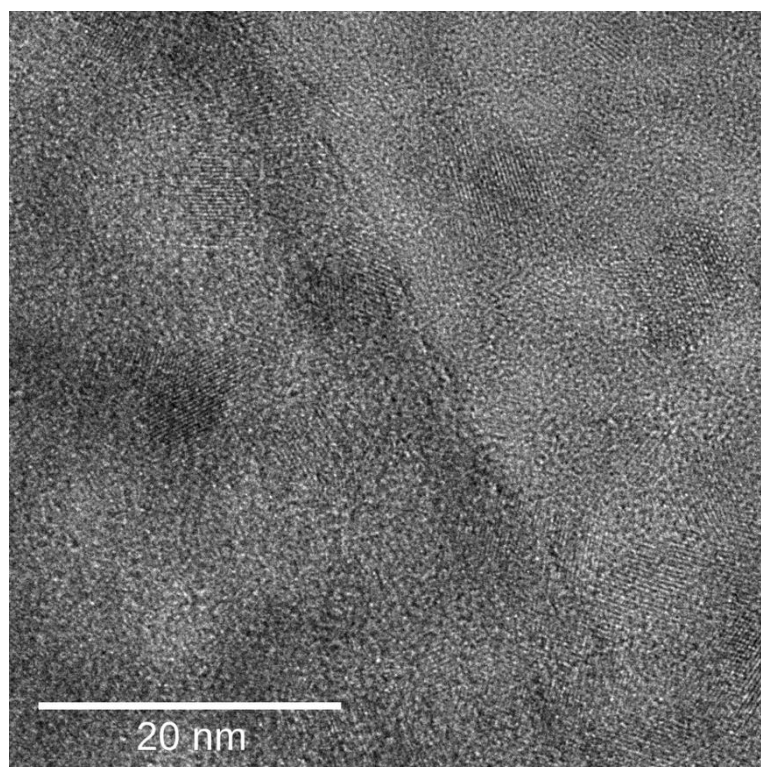

Figure S12. Degradation patches in the WS<sub>2</sub> nanostructure were observed after 1000 cycles.

**Table S1 ORR data comparison of different phases of MS<sub>2</sub>**

| Material         | 2H phase % | 1T' phase % | S-source                          | Onset potential (V vs. RHE) |
|------------------|------------|-------------|-----------------------------------|-----------------------------|
| MoS <sub>2</sub> | 100        | 0           | S-OLA                             | 0.76                        |
| MoS <sub>2</sub> | 58         | 42          | <i>tert</i> -butyl disulphide-OLA | 0.77                        |
| MoS <sub>2</sub> | 40         | 60          | 1-DDT-OLA                         | 0.82                        |
| MoS <sub>2</sub> | 0          | 100         | S-squalane                        | 0.79                        |
| WS <sub>2</sub>  | 77         | 23          | S-OLA                             | 0.74                        |
| WS <sub>2</sub>  | 65         | 35          | <i>tert</i> -butyl disulphide-OLA | 0.79                        |
| WS <sub>2</sub>  | 48         | 52          | 1-DDT-OLA                         | 0.76                        |
| WS <sub>2</sub>  | 17         | 83          | S-squalane                        | 0.77                        |

The mixed phase MoS<sub>2</sub> with 2H (40%)-1T (60%) synthesised using 1-DDT as S source exhibits the highest onset of 0.82 V compared to mixed phase MoS<sub>2</sub> with 2H (58%) -1T (42%) synthesized using *tert*-butyl disulphide as sulphur source with onset of 0.77 V. This could be attributed to increased electronic conductivity for presence of higher percentage of 1T' phase in the MoS<sub>2</sub> polytype synthesized using 1-DDT.<sup>1</sup> However, in case of WS<sub>2</sub> we see samples with high 2H percentage (WS<sub>2</sub> 2H(65%) - 1T(35%)) synthesized using *tert*-butyl disulphide as sulphur source exhibits a positive ORR onset of 0.79 V compared to WS<sub>2</sub> (0.76 V) mixed phase (2H (48%)-1T (52%)) with higher 1T phase synthesized using 1-DDT as S source. The deviance in WS<sub>2</sub> could be due to the lower stability of 1T' phase, thus, a higher percentage of 2H phase is required for the stability of the polytype.<sup>2</sup> But increasing the 2H phase in WS<sub>2</sub> further as for S-OLA is possibly detrimental for electronic conductivity resulting in a negative shift in onset potential. Overall, the polytypic NCs perform better than the monophase NCs. This is probably due to the presence of heterointerfaces beneficial for improved charge transfer and stability. The onset values are calculated from the polytype LSVs for ORR shown in Figure S13.

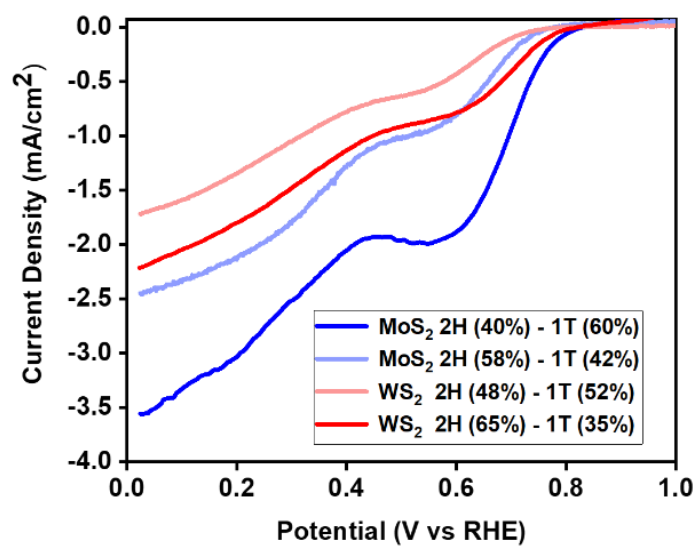

Figure S13. Comparison of LSVs of the polytypic MS<sub>2</sub> NCs.

**Table S2. ORR comparison**

| Material                   | Onset potential /V vs RHE | Synthesis Method      | Reference                                   |
|----------------------------|---------------------------|-----------------------|---------------------------------------------|
| MoS <sub>2</sub>           | 0.78                      | Hydrothermal          | Appl. Surf. Sci., 2020, 526, 146751         |
| MoS <sub>2</sub>           | 0.78                      | Solid-state synthesis | ACS Catal. 2016, 6, 5724–5734               |
| WS <sub>2</sub>            | 0.73                      | Solid-state synthesis | ACS Catal. 2016, 6, 5724–5734               |
| MoS <sub>2</sub>           | 0.76                      | Solid-state synthesis | ACS Appl. Mater. Interfaces 2020, 12, 20383 |
| WS <sub>2</sub>            | 0.76                      | Solid-state synthesis | ACS Appl. Mater. Interfaces 2020, 12, 20383 |
| Polytypic MoS <sub>2</sub> | 0.82                      | Hot injection         | <b>This work</b>                            |
| Polytypic WS <sub>2</sub>  | 0.79                      | Hot injection         | <b>This work</b>                            |
| 1T MoS <sub>2</sub>        | 0.90                      | Exfoliation           | Nanoscale, 2018,10, 22549                   |
| 2H MoS <sub>2</sub>        | 0.79                      | Exfoliation           | Nanoscale, 2018,10, 22549                   |

**References:**

1. J. Q. Zhu, Z. C. Wang, H. J. Dai, Q. Q. Wang, R. Yang, H. Yu, M. Z. Liao, J. Zhang, W. Chen, Z. Wei, N. Li, L. J. Du, D. X. Shi, W. L. Wang, L. X. Zhang, Y. Jiang and G. Y. Zhang, *Nat Commun*, 2019, **10**.
2. Y. C. Lin, C. H. Yeh, H. C. Lin, M. D. Siao, Z. Liu, H. Nakajima, T. Okazaki, M. Y. Chou, K. Suenaga and P. W. Chiu, *Acs Nano*, 2018, **12**, 12080.
